# Supplementary material for: Suppressed RNA-Polymerase 1 Pathway Is Associated with Benign Multiple Sclerosis
Source: PLoS One. 2012 Oct 12;7(10):e46871. doi: 10.1371/journal.pone.0046871 (PMC3470584; doi:10.1371/journal.pone.0046871)
Supplement: Table S1 — List of the 406 MIGs differentiating between BMS and RRMS. (XLS) [file pone.0046871.s001.xls]

## Sheet: BMSvsTRR(406_0.01)
Affymetrix Probeset ID	Representative Public ID	p-value(Group (Benign=1, RR=0))	Direction	Gene Symbol	Gene Title
211971_s_at	AI653608	2.29979e-05	Down	LRPPRC	leucine-rich PPR-motif containing
216902_s_at	AF001549	4.85927e-05	Down	RRN3	RRN3 RNA polymerase I transcription factor homolog (yeast)
213447_at	AI672541	5.32364e-05	Down	IPW	imprinted in Prader-Willi syndrome
219700_at	NM_020405	5.55625e-05	Down	PLXDC1	plexin domain containing 1
208591_s_at	NM_000922	6.54352e-05	Down	PDE3B	phosphodiesterase 3B, cGMP-inhibited
213224_s_at	AK025724	7.83509e-05	Down	LOC92482	Hypothetical protein LOC92482
218440_at	NM_020166	9.21397e-05	Down	MCCC1	methylcrotonoyl-Coenzyme A carboxylase 1 (alpha)
208664_s_at	AU131711	0.000114838	Down	TTC3	tetratricopeptide repeat domain 3
209444_at	BC001851	0.000127474	Up	RAP1GDS1	RAP1, GTP-GDP dissociation stimulator 1
201061_s_at	M81635	0.000145952	Up	STOM	stomatin
221500_s_at	AK026970	0.000150069	Down	STX16	syntaxin 16
220715_at	NM_024992	0.000153191	Down	FLJ12547	hypothetical protein FLJ12547
221757_at	BE042976	0.000182854	Down	MGC17330	HGFL gene /// HGFL gene
214173_x_at	AW514900	0.000220157	Down	C19orf2	chromosome 19 open reading frame 2
215262_at	AF052160	0.000229378	Down	---	Clone 24629 mRNA sequence
205108_s_at	NM_000384	0.00023559	Up	APOB	apolipoprotein B (including Ag(x) antigen)
200814_at	NM_006263	0.000248545	Up	PSME1	proteasome (prosome, macropain) activator subunit 1 (PA28 alpha)
221700_s_at	AF348700	0.000298167	Down	UBA52	ubiquitin A-52 residue ribosomal protein fusion product 1 /// ubiquitin A-52 res
209234_at	BF939474	0.000331038	Up	KIF1B	kinesin family member 1B
207033_at	NM_005142	0.000342443	Up	GIF	gastric intrinsic factor (vitamin B synthesis)
221602_s_at	AI084226	0.000358037	Down	TOSO	regulator of Fas-induced apoptosis /// regulator of Fas-induced apoptosis
204498_s_at	NM_001116	0.000372008	Down	ADCY9	adenylate cyclase 9
210707_x_at	U38980	0.000375592	Down	PMS2L11	postmeiotic segregation increased 2-like 11
215177_s_at	AV733308	0.000401118	Down	ITGA6	integrin, alpha 6
216885_s_at	AK026481	0.000406752	Down	WDR42A	WD repeat domain 42A
210969_at	AF118089	0.000419707	Down	PKN2	protein kinase N2
221280_s_at	NM_019619	0.000464608	Up	PARD3	par-3 partitioning defective 3 homolog (C. elegans)
217656_at	AW128846	0.000526821	Down	---	---
200609_s_at	NM_017491	0.000541213	Up	WDR1	WD repeat domain 1
220167_s_at	NM_015369	0.000544217	Up	TP53TG3	TP53TG3 protein
212132_at	AL117499	0.000551551	Down	C19orf13	chromosome 19 open reading frame 13
210073_at	L32867	0.000565619	Up	SIAT8A	sialyltransferase 8A (alpha-N-acetylneuraminate: alpha-2,8-sialyltransferase, GD
208265_at	NM_020161	0.000606336	Down	DKFZp547H025	hypothetical protein DKFZp547H025
216908_x_at	AF001549	0.000621504	Down	LOC94431	similar to RNA polymerase I transcription factor RRN3
219288_at	NM_020685	0.000666667	Up	C3orf14	chromosome 3 open reading frame 14
216683_at	AL353949	0.00068467	Down	---	---
203208_s_at	BF214329	0.000688522	Up	CHPPR	likely ortholog of chicken chondrocyte protein with a poly-proline region
204241_at	BF055171	0.000695223	Up	ACOX3	acyl-Coenzyme A oxidase 3, pristanoyl
215412_x_at	AB017007	0.000710051	Down	PMS2L2	postmeiotic segregation increased 2-like 2
220236_at	NM_017990	0.000713604	Down	PDPR	pyruvate dehydrogenase phosphatase regulatory subunit
220755_s_at	NM_016947	0.000795192	Down	C6orf48	chromosome 6 open reading frame 48
202743_at	BE622627	0.000795573	Up	PIK3R3	phosphoinositide-3-kinase, regulatory subunit 3 (p55, gamma)
219759_at	NM_022350	0.000802827	Up	LRAP	leukocyte-derived arginine aminopeptidase
213322_at	AL031778	0.000831488	Down	C6orf130	chromosome 6 open reading frame 130
201380_at	NM_006371	0.000845086	Down	CRTAP	cartilage associated protein
211848_s_at	AF006623	0.000877068	Down	CEACAM7	carcinoembryonic antigen-related cell adhesion molecule 7
201060_x_at	AI537887	0.000912495	Up	STOM	stomatin
208442_s_at	NM_000051	0.000986822	Down	ATM	ataxia telangiectasia mutated (includes complementation groups A, C and D)
211077_s_at	Z25421	0.000989313	Down	TLK1	tousled-like kinase 1 /// tousled-like kinase 1
215667_x_at	AI375694	0.00100339	Down	PMS2L2 /// PMS2L5	postmeiotic segregation increased 2-like 2 /// postmeiotic segregation increased
200081_s_at	BE741754	0.00102142	Down	RPS6	ribosomal protein S6 /// ribosomal protein S6
34063_at	AB006533	0.00102624	Down	RECQL5	RecQ protein-like 5
209524_at	AK001280	0.00103495	Up	HDGFRP3	hepatoma-derived growth factor, related protein 3
218670_at	NM_025215	0.00105356	Down	PUS1	pseudouridylate synthase 1
217666_at	AW974481	0.00105618	Down	---	---
204019_s_at	NM_015677	0.00110967	Down	SH3YL1	SH3 domain containing, Ysc84-like 1 (S. cerevisiae)
215771_x_at	X15786	0.00114484	Down	RET	ret proto-oncogene (multiple endocrine neoplasia and medullary thyroid carcinoma
219834_at	NM_024744	0.00120002	Down	ALS2CR8	amyotrophic lateral sclerosis 2 (juvenile) chromosome region, candidate 8
202112_at	NM_000552	0.00122096	Up	VWF	von Willebrand factor
46947_at	T87245	0.00122545	Down	FLJ10613	Hypothetical protein FLJ10613
212217_at	AU154782	0.00132366	Down	KIAA0436	putative prolyl oligopeptidase
203344_s_at	NM_002894	0.00132548	Up	RBBP8	retinoblastoma binding protein 8
202468_s_at	NM_003798	0.00135865	Up	CTNNAL1	catenin (cadherin-associated protein), alpha-like 1
201609_x_at	AL578502	0.00136437	Up	ICMT	isoprenylcysteine carboxyl methyltransferase
220179_at	NM_022357	0.0014039	Down	DPEP3	dipeptidase 3
218210_at	NM_024619	0.00142049	Down	FN3KRP	fructosamine-3-kinase-related protein
212550_at	AI149535	0.00145564	Down	STAT5B	signal transducer and activator of transcription 5B
218325_s_at	NM_022105	0.00146157	Down	DATF1	death associated transcription factor 1
212257_s_at	AW131754	0.00150909	Down	SMARCA2	SWI/SNF related, matrix associated, actin dependent regulator of chromatin, subf
201318_s_at	NM_006471	0.00151685	Up	MRLC2 /// MRCL3	myosin regulatory light chain MRLC2 /// myosin regulatory light chain MRCL3
202894_at	NM_004444	0.00152328	Down	EPHB4	EPH receptor B4
218475_at	NM_022727	0.00153155	Down	HTF9C	HpaII tiny fragments locus 9C
220485_s_at	NM_018556	0.00155962	Down	SIRPB2	signal-regulatory protein beta 2
212400_at	AL043266	0.00157284	Down	MGC50853	hypothetical protein MGC50853
200672_x_at	NM_003128	0.00159055	Down	SPTBN1	spectrin, beta, non-erythrocytic 1
212854_x_at	AB051480	0.00160128	Down	LOC376745	AG1
206828_at	NM_003328	0.00161937	Down	TXK	TXK tyrosine kinase
219257_s_at	NM_021972	0.00162142	Up	SPHK1	sphingosine kinase 1
214958_s_at	AK021738	0.00162157	Down	EVER1	epidermodysplasia verruciformis 1
210461_s_at	BC002448	0.00163303	Down	ABLIM1	actin binding LIM protein 1
216959_x_at	U55258	0.00164889	Down	NRCAM	neuronal cell adhesion molecule
211354_s_at	U52913	0.00166745	Up	LEPR	leptin receptor
215512_at	AK000970	0.00173899	Down	MARCH-VI	membrane-associated RING-CH protein VI
216230_x_at	M59917	0.00174335	Down	---	---
207120_at	NM_022103	0.00174913	Down	FLJ14011	hypothetical zinc finger protein FLJ14011
209134_s_at	BC000524	0.00176504	Down	RPS6	ribosomal protein S6
213787_s_at	AV702405	0.00177929	Up	EBP	emopamil binding protein (sterol isomerase)
203731_s_at	NM_014569	0.00178352	Up	ZFP95	zinc finger protein 95 homolog (mouse)
208795_s_at	D55716	0.00181147	Down	MCM7	MCM7 minichromosome maintenance deficient 7 (S. cerevisiae)
203939_at	NM_002526	0.00183692	Down	NT5E	5'-nucleotidase, ecto (CD73)
210628_x_at	AF051344	0.00193072	Down	LTBP4	latent transforming growth factor beta binding protein 4
202067_s_at	AI861942	0.00194792	Up	LDLR	low density lipoprotein receptor (familial hypercholesterolemia)
205750_at	NM_004332	0.00195118	Down	BPHL	biphenyl hydrolase-like (serine hydrolase; breast epithelial mucin-associated an
203579_s_at	AI660619	0.00197511	Down	SLC7A6	solute carrier family 7 (cationic amino acid transporter, y+ system), member 6
210948_s_at	AF294627	0.00198394	Down	LEF1	lymphoid enhancer-binding factor 1
211172_x_at	AF161075	0.00199791	Down	AKAP7	A kinase (PRKA) anchor protein 7
207738_s_at	NM_013436	0.00200421	Up	NCKAP1	NCK-associated protein 1
206992_s_at	NM_015684	0.00202904	Up	ATP5S	ATP synthase, H+ transporting, mitochondrial F0 complex, subunit s (factor B)
210557_x_at	M76453	0.00204412	Up	CSF1	colony stimulating factor 1 (macrophage)
220465_at	NM_024988	0.0020787	Down	FLJ12355	hypothetical protein FLJ12355
203048_s_at	NM_014639	0.0021392	Down	KIAA0372	KIAA0372
208782_at	BC000055	0.00214109	Up	FSTL1	follistatin-like 1
207105_s_at	NM_005027	0.0021495	Down	PIK3R2	phosphoinositide-3-kinase, regulatory subunit 2 (p85 beta)
210645_s_at	D83077	0.00220123	Down	TTC3	tetratricopeptide repeat domain 3
213726_x_at	AA515698	0.00222365	Up	TUBB2	tubulin, beta, 2
221536_s_at	AL136897	0.00227731	Up	FLJ11301	hypothetical protein FLJ11301
207603_at	NM_003615	0.00230122	Down	SLC4A7	solute carrier family 4, sodium bicarbonate cotransporter, member 7
31874_at	Y07846	0.00231622	Up	GAS2L1	growth arrest-specific 2 like 1
201470_at	NM_004832	0.00234747	Up	GSTO1	glutathione S-transferase omega 1
208898_at	AF077614	0.00236559	Up	ATP6V1D	ATPase, H+ transporting, lysosomal 34kDa, V1 subunit D
214073_at	BG475299	0.00236902	Up	CTTN	cortactin
221293_s_at	NM_022047	0.00241676	Down	DEF6	differentially expressed in FDCP 6 homolog (mouse)
216945_x_at	U79240	0.00244651	Down	PASK	PAS domain containing serine/threonine kinase
221756_at	BE042976	0.00252323	Down	MGC17330	HGFL gene /// HGFL gene
221601_s_at	AI084226	0.00253658	Down	TOSO	regulator of Fas-induced apoptosis /// regulator of Fas-induced apoptosis
218907_s_at	NM_023942	0.00261834	Up	MGC3036	hypothetical protein MGC3036
210793_s_at	U41815	0.00263525	Up	NUP98	nucleoporin 98kDa
221951_at	AI739035	0.0026458	Down	LOC283232	hypothetical protein LOC283232
216784_at	AK025422	0.00267809	Down	---	Transcribed locus, weakly similar to XP_375174.1 hypothetical gene supported by
212071_s_at	BE968833	0.00268444	Down	SPTBN1	spectrin, beta, non-erythrocytic 1
207334_s_at	NM_003242	0.00270047	Down	TGFBR2	transforming growth factor, beta receptor II (70/80kDa)
206247_at	NM_005931	0.00270108	Up	MICB	MHC class I polypeptide-related sequence B
218258_at	NM_015972	0.0027128	Down	POLR1D	polymerase (RNA) I polypeptide D, 16kDa
201278_at	N21202	0.00271395	Up	DAB2	Disabled homolog 2, mitogen-responsive phosphoprotein (Drosophila)
221526_x_at	AF196185	0.00271813	Up	PARD3	par-3 partitioning defective 3 homolog (C. elegans)
202378_s_at	NM_017526	0.00272324	Up	OBRGRP	leptin receptor gene-related protein
213154_s_at	AI934125	0.00275105	Up	BICD2	bicaudal D homolog 2 (Drosophila)
217385_at	AL023773	0.00278796	Down	---	---
219025_at	NM_020404	0.00283612	Down	CD164L1	CD164 sialomucin-like 1
213069_at	AI148659	0.0028955	Up	---	---
201234_at	NM_004517	0.00289769	Up	ILK	integrin-linked kinase
217208_s_at	AL121981	0.00291233	Down	DLG1	discs, large homolog 1 (Drosophila)
212455_at	N36997	0.00291373	Down	YT521	splicing factor YT521-B
207808_s_at	NM_000313	0.0029166	Up	PROS1	protein S (alpha)
207233_s_at	NM_000248	0.00292951	Up	MITF	microphthalmia-associated transcription factor
218285_s_at	NM_020139	0.00293094	Down	DHRS6	dehydrogenase/reductase (SDR family) member 6
214312_at	AI693985	0.00293268	Down	---	---
200633_at	NM_018955	0.00294226	Up	UBB	ubiquitin B /// ubiquitin B
212178_s_at	AK022555	0.00294562	Down	POM121 /// LOC340318	POM121 membrane glycoprotein (rat) /// hypothetical protein LOC340318
210796_x_at	D86359	0.00295213	Up	SIGLEC6	sialic acid binding Ig-like lectin 6
200898_s_at	AK002091	0.00297023	Down	MGEA5	meningioma expressed antigen 5 (hyaluronidase)
200965_s_at	NM_006720	0.00298281	Down	ABLIM1	actin binding LIM protein 1
202006_at	NM_002835	0.00301102	Up	PTPN12	protein tyrosine phosphatase, non-receptor type 12
210241_s_at	AB007458	0.00302148	Up	TP53AP1	TP53 activated protein 1
205254_x_at	AW027359	0.00305418	Down	TCF7	transcription factor 7 (T-cell specific, HMG-box)
210349_at	L24959	0.0030661	Down	CAMK4	calcium/calmodulin-dependent protein kinase IV
202085_at	NM_004817	0.00310437	Up	TJP2	tight junction protein 2 (zona occludens 2)
214042_s_at	AW071997	0.00311097	Down	RPL22	ribosomal protein L22
220607_x_at	NM_016397	0.00314987	Down	TH1L	TH1-like (Drosophila)
204769_s_at	NM_000544	0.00315346	Up	TAP2	transporter 2, ATP-binding cassette, sub-family B (MDR/TAP)
61734_at	AI797684	0.00318582	Down	RCN3	reticulocalbin 3, EF-hand calcium binding domain
212730_at	AK026420	0.00318998	Up	DMN	desmuslin
219938_s_at	NM_024430	0.00319492	Up	PSTPIP2	proline-serine-threonine phosphatase interacting protein 2
219131_at	NM_013319	0.00321435	Down	TERE1	transitional epithelia response protein
219144_at	NM_024025	0.00322753	Down	MGC1136	hypothetical protein MGC1136
211937_at	NM_001417	0.00323874	Down	EIF4B	eukaryotic translation initiation factor 4B
214447_at	NM_005238	0.00328131	Down	ETS1	v-ets erythroblastosis virus E26 oncogene homolog 1 (avian)
214629_x_at	AF320999	0.0032934	Up	RTN4	reticulon 4
220684_at	NM_013351	0.00334196	Up	TBX21	T-box 21
219798_s_at	NM_019606	0.00337934	Up	FLJ20257	hypothetical protein FLJ20257
221563_at	N36770	0.00341276	Up	DUSP10	dual specificity phosphatase 10
202090_s_at	NM_006830	0.00341487	Up	UQCR	ubiquinol-cytochrome c reductase (6.4kD) subunit
221981_s_at	AA702154	0.00344827	Down	FLJ12270	hypothetical protein FLJ12270
211272_s_at	AF064771	0.00345724	Down	DGKA	diacylglycerol kinase, alpha 80kDa
209456_s_at	AB033281	0.00348647	Down	FBXW11	F-box and WD-40 domain protein 11
205019_s_at	NM_004624	0.00356122	Down	VIPR1	vasoactive intestinal peptide receptor 1
216298_at	AL580863	0.00356675	Down	---	Similar to T-cell receptor gamma chain V region PT-gamma-1/2 precursor /// Simil
203819_s_at	AU160004	0.00357676	Up	IMP-3	IGF-II mRNA-binding protein 3
204787_at	NM_007268	0.00360841	Down	VSIG4	V-set and immunoglobulin domain containing 4
202087_s_at	NM_001912	0.00362744	Up	CTSL	cathepsin L
207838_x_at	NM_020524	0.00363153	Down	PBXIP1	pre-B-cell leukemia transcription factor interacting protein 1
201403_s_at	NM_004528	0.00363874	Up	MGST3	microsomal glutathione S-transferase 3
207375_s_at	NM_002189	0.00371395	Up	IL15RA	interleukin 15 receptor, alpha
215519_x_at	AI081779	0.00372094	Down	RUTBC3	RUN and TBC1 domain containing 3
215698_at	AF007135	0.00373306	Down	JARID1A	Jumonji, AT rich interactive domain 1A (RBBP2-like)
218945_at	NM_024109	0.00375134	Up	MGC2654	hypothetical protein MGC2654
210892_s_at	BC004472	0.00377022	Down	GTF2I	general transcription factor II, i
219767_s_at	NM_005111	0.00378775	Down	CRYZL1	crystallin, zeta (quinone reductase)-like 1
201346_at	NM_024551	0.00380591	Up	ADIPOR2	adiponectin receptor 2
221535_at	AL136897	0.00381425	Up	FLJ11301	hypothetical protein FLJ11301
201761_at	NM_006636	0.00383348	Up	MTHFD2	methylene tetrahydrofolate dehydrogenase (NAD+ dependent), methenyltetrahydrofol
220201_at	NM_018835	0.00385166	Up	MNAB	membrane associated DNA binding protein
210968_s_at	AF333336	0.00385654	Up	RTN4	reticulon 4
213534_s_at	D50925	0.00386476	Down	PASK	PAS domain containing serine/threonine kinase
215556_at	AU158442	0.00389721	Down	---	---
208805_at	BC002979	0.0039671	Up	PSMA6	proteasome (prosome, macropain) subunit, alpha type, 6
216380_x_at	AC005011	0.00397304	Down	---	---
65517_at	AA910946	0.00400366	Up	AP1M2	adaptor-related protein complex 1, mu 2 subunit
201065_s_at	NM_001518	0.00401535	Down	GTF2I /// GTF2IP1	general transcription factor II, i /// general transcription factor II, i, pseud
207018_s_at	NM_004163	0.00401752	Up	RAB27B	RAB27B, member RAS oncogene family
218176_at	NM_022149	0.00404097	Down	MAGEF1	melanoma antigen, family F, 1
217122_s_at	AL031282	0.00405083	Down	SLC35E2	solute carrier family 35, member E2
207127_s_at	NM_021644	0.00405955	Down	HNRPH3	heterogeneous nuclear ribonucleoprotein H3 (2H9)
215437_x_at	BE513659	0.00406025	Down	BAZ2A	bromodomain adjacent to zinc finger domain, 2A
203913_s_at	NM_000860	0.00408799	Down	HPGD	hydroxyprostaglandin dehydrogenase 15-(NAD)
217752_s_at	NM_018235	0.00410801	Up	CNDP2	CNDP dipeptidase 2 (metallopeptidase M20 family)
208333_at	NM_022363	0.00411129	Down	LHX5	LIM homeobox 5
209547_s_at	BC001043	0.00413684	Up	SF4	splicing factor 4
207164_s_at	NM_006352	0.00417361	Down	ZNF238	zinc finger protein 238
202922_at	BF676980	0.00418508	Up	GCLC	glutamate-cysteine ligase, catalytic subunit
200005_at	NM_003753	0.00422937	Down	EIF3S7	eukaryotic translation initiation factor 3, subunit 7 zeta, 66/67kDa /// eukaryo
213472_at	AI022387	0.00424591	Down	HNRPH1	heterogeneous nuclear ribonucleoprotein H1 (H)
214972_at	AU144791	0.00424941	Down	MGEA5	Meningioma expressed antigen 5 (hyaluronidase)
210826_x_at	AF098533	0.00427661	Down	RAD17	RAD17 homolog (S. pombe)
200734_s_at	BG341906	0.00432763	Up	ARF3	ADP-ribosylation factor 3
210542_s_at	BC000585	0.0043838	Up	SLCO3A1	solute carrier organic anion transporter family, member 3A1
217184_s_at	X52213	0.00440321	Down	LTK	leukocyte tyrosine kinase
208790_s_at	AF312393	0.00443254	Up	PTRF	polymerase I and transcript release factor
204114_at	NM_007361	0.00444653	Up	NID2	nidogen 2 (osteonidogen)
203090_at	NM_006923	0.00445065	Up	SDF2	stromal cell-derived factor 2
213481_at	N92920	0.00446784	Down	---	---
212406_s_at	AB028973	0.00447777	Down	C20orf36	chromosome 20 open reading frame 36
214850_at	X75940	0.00448176	Down	SMA4	SMA4
64432_at	W05463	0.00453045	Down	FLJ39616	apoptosis-related protein PNAS-1
212982_at	AI621223	0.004574	Down	ZDHHC17	zinc finger, DHHC domain containing 17
210354_at	M29383	0.00460471	Up	---	---
211181_x_at	AF312386	0.00463009	Down	RUNX1	runt-related transcription factor 1 (acute myeloid leukemia 1; aml1 oncogene)
203097_s_at	NM_014247	0.00465919	Up	RAPGEF2	Rap guanine nucleotide exchange factor (GEF) 2
202514_at	AW139131	0.00470316	Down	DLG1	DKFZP586B0319 protein
212886_at	AL080169	0.00475901	Down	DKFZP434C171	DKFZP434C171 protein
201788_at	NM_007372	0.00476949	Down	DDX42	DEAD (Asp-Glu-Ala-Asp) box polypeptide 42
218532_s_at	NM_019000	0.00479563	Down	FLJ20152	hypothetical protein FLJ20152
219410_at	NM_018004	0.00480806	Up	FLJ10134	hypothetical protein FLJ10134
208661_s_at	D84294	0.0048507	Down	TTC3	tetratricopeptide repeat domain 3
202193_at	NM_005569	0.0048798	Up	LIMK2	LIM domain kinase 2
214157_at	AA401492	0.00490475	Up	GNAS	GNAS complex locus
221822_at	BE544663	0.00491451	Down	LOC112869	hypothetical protein BC011981
201798_s_at	NM_013451	0.00500618	Up	FER1L3	fer-1-like 3, myoferlin (C. elegans)
216891_at	U00956	0.00503083	Up	---	---
218967_s_at	BF112019	0.00507759	Down	PTER	phosphotriesterase related
217742_s_at	NM_016628	0.00513597	Down	WAC	WW domain containing adaptor with coiled-coil
214070_s_at	AW006935	0.00514262	Up	ATP10B	ATPase, Class V, type 10B
222244_s_at	AK000749	0.00514403	Down	FLJ20618	hypothetical protein FLJ20618
216387_x_at	AL353580	0.00514674	Down	---	---
222013_x_at	BE348837	0.00516172	Down	LOC348926 /// MGC16279 /// SB153 /// FLJ10661	hypothetical protein LOC348926 /// hypothetical protein MGC16279 /// hypothetica
59625_at	AI912351	0.00519225	Up	NOL3	nucleolar protein 3 (apoptosis repressor with CARD domain)
214757_at	BG178274	0.00520157	Down	---	Hypothetical gene supported by AK024602
212660_at	AI735639	0.00522401	Down	PHF15	PHD finger protein 15
217730_at	NM_022152	0.00526498	Up	PP1201	PP1201 protein
202377_at	AW026535	0.00530475	Up	OBRGRP /// LEPR	leptin receptor gene-related protein /// leptin receptor
208336_s_at	NM_004868	0.0053251	Down	GPSN2	glycoprotein, synaptic 2
216909_at	AK021460	0.00534354	Down	---	---
203675_at	NM_005013	0.00537624	Down	NUCB2	nucleobindin 2
201975_at	NM_002956	0.00538566	Up	RSN	restin (Reed-Steinberg cell-expressed intermediate filament-associated protein)
218571_s_at	NM_014169	0.00540983	Up	C14orf123	chromosome 14 open reading frame 123
202524_s_at	AI952009	0.00542908	Down	SPOCK2	sparc/osteonectin, cwcv and kazal-like domains proteoglycan (testican) 2
215137_at	H92070	0.00545687	Down	KIAA0508	KIAA0508 protein
219629_at	NM_017911	0.00550884	Down	C22orf8	chromosome 22 open reading frame 8
200637_s_at	AI762627	0.00552048	Up	PTPRF	protein tyrosine phosphatase, receptor type, F
208944_at	D50683	0.00553528	Down	---	---
201980_s_at	NM_012425	0.00558701	Up	RSU1	Ras suppressor protein 1
204102_s_at	NM_001961	0.00559073	Down	EEF2	eukaryotic translation elongation factor 2
206579_at	NM_006298	0.00563577	Down	ZNF192	zinc finger protein 192
206544_x_at	NM_003070	0.00564343	Down	SMARCA2	SWI/SNF related, matrix associated, actin dependent regulator of chromatin, subf
209213_at	BC002511	0.00568941	Up	CBR1	carbonyl reductase 1
202068_s_at	NM_000527	0.00571688	Up	LDLR	low density lipoprotein receptor (familial hypercholesterolemia)
219199_at	NM_014423	0.00571933	Down	AF5Q31	ALL1 fused gene from 5q31
218253_s_at	NM_006893	0.00575442	Down	LGTN	ligatin
209835_x_at	BC004372	0.00579396	Down	CD44	CD44 antigen (homing function and Indian blood group system)
217850_at	NM_014366	0.00580529	Down	NS	nucleostemin
202830_s_at	NM_001467	0.00582091	Down	SLC37A4	solute carrier family 37 (glycerol-6-phosphate transporter), member 4
220122_at	NM_024717	0.00582118	Up	MCTP1	multiple C2-domains with two transmembrane regions 1
206254_at	NM_001963	0.00583466	Up	EGF	epidermal growth factor (beta-urogastrone)
219785_s_at	NM_024735	0.00583933	Up	FBXO31	F-box protein 31
200703_at	NM_003746	0.00587673	Up	DNCL1	dynein, cytoplasmic, light polypeptide 1
212234_at	AL034550	0.00593683	Down	ASXL1	additional sex combs like 1 (Drosophila)
212201_at	AW274877	0.00595554	Down	KIAA0692	KIAA0692 protein
210029_at	M34455	0.00596733	Up	INDO	indoleamine-pyrrole 2,3 dioxygenase
210102_at	BC001234	0.00597472	Up	LOH11CR2A	loss of heterozygosity, 11, chromosomal region 2, gene A
203337_x_at	NM_004763	0.00603174	Up	ITGB1BP1	integrin beta 1 binding protein 1
220408_x_at	NM_017569	0.00606412	Down	FAM48A	family with sequence similarity 48, member A
213648_at	AW614427	0.00610927	Up	EXOSC7	Exosome component 7
212299_at	AL117502	0.00613902	Down	NEK9	NIMA (never in mitosis gene a)- related kinase 9
202000_at	BC002772	0.00614703	Up	NDUFA6	NADH dehydrogenase (ubiquinone) 1 alpha subcomplex, 6, 14kDa
211666_x_at	L22453	0.00617276	Down	RPL3	ribosomal protein L3 /// ribosomal protein L3
214857_at	AL050035	0.00620633	Down	---	MRNA; cDNA DKFZp566H0124 (from clone DKFZp566H0124)
213176_s_at	AI910869	0.00621309	Down	LTBP4	latent transforming growth factor beta binding protein 4
216843_x_at	U38964	0.00621792	Down	---	---
203880_at	NM_005694	0.00623952	Up	COX17	COX17 homolog, cytochrome c oxidase assembly protein (yeast)
209933_s_at	AF020314	0.00624048	Up	CMRF-35H	leukocyte membrane antigen
219422_at	NM_003790	0.00624069	Down	---	---
219829_at	NM_012278	0.00624403	Down	ITGB1BP2	integrin beta 1 binding protein (melusin) 2
201922_at	NM_014886	0.00629903	Down	TINP1	TGF beta-inducible nuclear protein 1
203408_s_at	NM_002971	0.0063127	Down	SATB1	special AT-rich sequence binding protein 1 (binds to nuclear matrix/scaffold-ass
216693_x_at	AL133102	0.00634204	Up	HDGFRP3	hepatoma-derived growth factor, related protein 3
218373_at	NM_022476	0.00635432	Down	FTS	fused toes homolog (mouse)
215041_s_at	BE259050	0.00635578	Down	DOCK9	dedicator of cytokinesis 9
217718_s_at	NM_014052	0.00635809	Up	YWHAB	tyrosine 3-monooxygenase/tryptophan 5-monooxygenase activation protein, beta pol
204929_s_at	NM_006634	0.00638326	Up	VAMP5	vesicle-associated membrane protein 5 (myobrevin)
212586_at	AA195244	0.0064183	Up	CAST	calpastatin
203499_at	NM_004431	0.00648561	Up	EPHA2	EPH receptor A2
205467_at	NM_001230	0.00649895	Up	CASP10	caspase 10, apoptosis-related cysteine protease
218358_at	NM_024324	0.00656737	Up	---	---
218243_at	NM_025158	0.00661822	Up	RUFY1	RUN and FYVE domain containing 1
207298_at	NM_006632	0.00668185	Up	SLC17A3	solute carrier family 17 (sodium phosphate), member 3
209546_s_at	AF323540	0.0067075	Up	APOL1	apolipoprotein L, 1
205378_s_at	NM_015831	0.00679352	Down	ACHE	acetylcholinesterase (YT blood group)
201931_at	NM_000126	0.00690238	Up	ETFA	electron-transfer-flavoprotein, alpha polypeptide (glutaric aciduria II)
217631_at	AI081107	0.00696582	Down	IDI2 /// GTPBP4	isopentenyl-diphosphate delta isomerase 2 /// GTP binding protein 4
215244_at	AI479306	0.00696892	Down	DGCR5	DiGeorge syndrome critical region gene 5 (non-coding)
202949_s_at	NM_001450	0.00698693	Up	FHL2	four and a half LIM domains 2
218444_at	NM_024105	0.00699374	Down	ALG12	asparagine-linked glycosylation 12 homolog (yeast, alpha-1,6-mannosyltransferase
204448_s_at	AF031463	0.00700123	Up	PDCL	phosducin-like
202245_at	AW084510	0.00702241	Up	LSS	lanosterol synthase (2,3-oxidosqualene-lanosterol cyclase)
209735_at	AF098951	0.00704966	Up	ABCG2	ATP-binding cassette, sub-family G (WHITE), member 2
210012_s_at	BC000527	0.00710458	Down	EWSR1	Ewing sarcoma breakpoint region 1
213317_at	AL049313	0.00715488	Up	CLIC5	Chloride intracellular channel 5
218707_at	NM_018337	0.00716098	Down	ZNF444	zinc finger protein 444
209278_s_at	L27624	0.00717547	Up	TFPI2	tissue factor pathway inhibitor 2
215411_s_at	AL008730	0.00721431	Down	C6orf4	chromosome 6 open reading frame 4
211864_s_at	AF207990	0.00726934	Up	FER1L3	fer-1-like 3, myoferlin (C. elegans)
218651_s_at	NM_018357	0.00730148	Down	FLJ11196	acheron
210192_at	AB013452	0.00732108	Down	ATP8A1	ATPase, aminophospholipid transporter (APLT), Class I, type 8A, member 1
221977_at	AW303460	0.00735044	Down	---	---
50400_at	AI743990	0.00735099	Up	PAOX	polyamine oxidase (exo-N4-amino)
201254_x_at	NM_001010	0.00737427	Down	RPS6	ribosomal protein S6
202431_s_at	NM_002467	0.00739292	Down	MYC	v-myc myelocytomatosis viral oncogene homolog (avian)
216139_s_at	AL031718	0.00739981	Down	MAPK8IP3	mitogen-activated protein kinase 8 interacting protein 3
210379_s_at	AI469203	0.00741962	Down	TLK1	tousled-like kinase 1
206638_at	NM_000867	0.00746906	Up	HTR2B	5-hydroxytryptamine (serotonin) receptor 2B
201819_at	NM_005505	0.00748445	Down	SCARB1	scavenger receptor class B, member 1
217461_x_at	M90355	0.00755897	Down	---	---
221707_s_at	BC006116	0.00760199	Down	FLJ10979	hypothetical protein FLJ10979 /// hypothetical protein FLJ10979
221598_s_at	BC002878	0.00763086	Up	CRSP8	cofactor required for Sp1 transcriptional activation, subunit 8, 34kDa
213324_at	AK024281	0.00763177	Up	SRC	v-src sarcoma (Schmidt-Ruppin A-2) viral oncogene homolog (avian)
217237_at	Y10615	0.00771933	Down	ZNF423	Zinc finger protein 423
221474_at	U26162	0.00775113	Up	MRLC2	myosin regulatory light chain MRLC2
208398_s_at	NM_004865	0.00775587	Up	TBPL1	TBP-like 1
202001_s_at	BC002772	0.00778397	Up	NDUFA6	NADH dehydrogenase (ubiquinone) 1 alpha subcomplex, 6, 14kDa
218584_at	NM_024549	0.00779161	Down	FLJ21127	hypothetical protein FLJ21127
216419_at	AK026910	0.00781501	Down	CROCC	ciliary rootlet coiled-coil, rootletin
220369_at	NM_017936	0.00789849	Down	KIAA2010	KIAA2010
219899_x_at	NM_014434	0.0079693	Up	NDOR1	NADPH dependent diflavin oxidoreductase 1
205612_at	NM_007351	0.00797471	Up	MMRN1	multimerin 1
208908_s_at	AF327443	0.00798794	Up	CAST	calpastatin
212734_x_at	AI186735	0.00805757	Down	RPL13	ribosomal protein L13
205115_s_at	NM_016196	0.00806127	Up	RBM19	RNA binding motif protein 19
221723_s_at	AF243499	0.00808201	Down	SLC4A5	solute carrier family 4, sodium bicarbonate cotransporter, member 5
218927_s_at	BC002918	0.00809152	Up	CHST12	carbohydrate (chondroitin 4) sulfotransferase 12
212390_at	AB007923	0.00814641	Up	PDE4DIP	phosphodiesterase 4D interacting protein (myomegalin)
213982_s_at	BG107203	0.00815332	Up	RABGAP1L	RAB GTPase activating protein 1-like
206150_at	NM_001242	0.00816541	Down	TNFRSF7	tumor necrosis factor receptor superfamily, member 7 /// tumor necrosis factor r
201899_s_at	NM_003336	0.00816711	Up	UBE2A	ubiquitin-conjugating enzyme E2A (RAD6 homolog)
220249_at	NM_012269	0.00817043	Down	HYAL4	hyaluronoglucosaminidase 4
218152_at	NM_018200	0.00821592	Down	HMG20A	high-mobility group 20A
213687_s_at	BE968801	0.00825829	Down	RPL35A	ribosomal protein L35a
220471_s_at	NM_025107	0.00829025	Up	MYCT1	myc target 1
220458_at	NM_018038	0.0082986	Down	FLJ10246	hypothetical protein FLJ10246
200696_s_at	NM_000177	0.00830326	Up	GSN	gelsolin (amyloidosis, Finnish type)
212093_s_at	AI695017	0.00836613	Down	MTUS1	mitochondrial tumor suppressor 1
215676_at	N91109	0.00841535	Up	BRF1	BRF1 homolog, subunit of RNA polymerase III transcription initiation factor IIIB
219592_at	NM_024596	0.00842621	Up	MCPH1	microcephaly, primary autosomal recessive 1
217847_s_at	NM_005119	0.00843198	Down	THRAP3	thyroid hormone receptor associated protein 3
204781_s_at	NM_000043	0.00844382	Up	TNFRSF6	tumor necrosis factor receptor superfamily, member 6
221499_s_at	AK026970	0.00849351	Down	STX16	syntaxin 16
207467_x_at	NM_001750	0.00854376	Up	CAST	calpastatin
211938_at	BF247371	0.00855415	Down	EIF4B	eukaryotic translation initiation factor 4B
208678_at	BC004443	0.00857172	Up	ATP6V1E1	ATPase, H+ transporting, lysosomal 31kDa, V1 subunit E isoform 1
206049_at	NM_003005	0.00860315	Up	SELP	selectin P (granule membrane protein 140kDa, antigen CD62)
214817_at	BE783668	0.00860655	Up	UNC13A	unc-13 homolog A (C. elegans)
212062_at	AB014511	0.0086454	Up	ATP9A	ATPase, Class II, type 9A
214859_at	AI635302	0.00867537	Up	FSTL4	follistatin-like 4
215167_at	BE567032	0.0086876	Down	CRSP2	cofactor required for Sp1 transcriptional activation, subunit 2, 150kDa
212505_s_at	AL110250	0.00873011	Down	KIAA0892	KIAA0892
202040_s_at	NM_005056	0.00873433	Down	JARID1A	Jumonji, AT rich interactive domain 1A (RBBP2-like)
205594_at	NM_014897	0.00879313	Down	KIAA0924	KIAA0924 protein
221638_s_at	AF008937	0.00881373	Down	STX16	syntaxin 16
209593_s_at	AF317129	0.00881522	Up	TOR1B	torsin family 1, member B (torsin B)
202167_s_at	NM_022362	0.00881848	Down	MMS19L	MMS19-like (MET18 homolog, S. cerevisiae)
218428_s_at	NM_016316	0.00887406	Down	REV1L	REV1-like (yeast)
205126_at	NM_006296	0.00888626	Up	VRK2	vaccinia related kinase 2
213470_s_at	BF983406	0.00890521	Down	HNRPH1	heterogeneous nuclear ribonucleoprotein H1 (H)
209468_at	AB017498	0.00891262	Up	LRP5	low density lipoprotein receptor-related protein 5
202056_at	AW051311	0.00893156	Up	KPNA1	Karyopherin alpha 1 (importin alpha 5)
220442_at	NM_003774	0.00894482	Down	GALNT4	UDP-N-acetyl-alpha-D-galactosamine:polypeptide N-acetylgalactosaminyltransferase
217995_at	NM_021199	0.00901674	Up	SQRDL	sulfide quinone reductase-like (yeast)
217988_at	NM_021178	0.0090463	Down	CCNB1IP1	cyclin B1 interacting protein 1
221680_s_at	AF147782	0.00908294	Up	ETV7	ets variant gene 7 (TEL2 oncogene)
200067_x_at	AL078596	0.00910762	Up	---	---
213177_at	AB028989	0.00913435	Down	MAPK8IP3	mitogen-activated protein kinase 8 interacting protein 3
215201_at	AW166925	0.00914577	Down	REPS1	RALBP1 associated Eps domain containing 1
212864_at	Y16521	0.00916746	Up	CDS2	CDP-diacylglycerol synthase (phosphatidate cytidylyltransferase) 2
222318_at	AI744673	0.00920034	Up	FLJ45850	FLJ45850 protein
218520_at	NM_013254	0.00922848	Up	TBK1	TANK-binding kinase 1
212068_s_at	AB011087	0.00923176	Down	KIAA0515	KIAA0515
215275_at	AW963138	0.00930788	Down	T3JAM	TRAF3-interacting Jun N-terminal kinase (JNK)-activating modulator
220487_at	NM_018968	0.00934336	Down	SNTG2	syntrophin, gamma 2
200034_s_at	NM_000970	0.00934338	Down	RPL6	ribosomal protein L6 /// ribosomal protein L6
201110_s_at	NM_003246	0.00937537	Up	THBS1	thrombospondin 1
218525_s_at	NM_017902	0.00941626	Up	HIF1AN	hypoxia-inducible factor 1, alpha subunit inhibitor
206770_s_at	NM_012243	0.0094304	Down	SLC35A3	solute carrier family 35 (UDP-N-acetylglucosamine (UDP-GlcNAc) transporter), mem
208196_x_at	NM_006162	0.00943834	Down	NFATC1	nuclear factor of activated T-cells, cytoplasmic, calcineurin-dependent 1
208157_at	NM_009586	0.00947294	Down	SIM2	single-minded homolog 2 (Drosophila)
1405_i_at	M21121	0.00953727	Up	CCL5	chemokine (C-C motif) ligand 5
214161_at	BF057458	0.00955904	Down	---	---
212463_at	BE379006	0.0095814	Down	CD59	CD59 antigen p18-20 (antigen identified by monoclonal antibodies 16.3A5, EJ16, E
217078_s_at	AJ010102	0.00965076	Up	CMRF-35H	leukocyte membrane antigen
205353_s_at	NM_002567	0.009672	Down	PBP	prostatic binding protein
212114_at	BE967207	0.0097336	Down	---	Similar to microtubule-associated proteins 1A/1B light chain 3
220825_s_at	NM_018240	0.00974421	Up	KIRREL	kin of IRRE like (Drosophila)
218970_s_at	NM_015960	0.00975335	Down	CUTC	cutC copper transporter homolog (E.coli)
210011_s_at	BC000527	0.00977139	Down	EWSR1	Ewing sarcoma breakpoint region 1
211856_x_at	AF222341	0.0098352	Down	CD28	CD28 antigen (Tp44)
216034_at	AA558468	0.00989752	Up	SUHW1	suppressor of hairy wing homolog 1 (Drosophila)
204864_s_at	BE856546	0.00997767	Down	IL6ST	interleukin 6 signal transducer (gp130, oncostatin M receptor)
218567_x_at	NM_005700	0.00999791	Up	DPP3	dipeptidylpeptidase 3
